# Supplementary material for: Loop detection using Hi-C data with HiCExplorer
Source: PubMed Central journal article supplement (PMC9270730; doi:10.1093/gigascience/giac061), 2022-07-09
Supplement: giac061_response_to_reviewer_comments_revision_2.pdf [file giac061_response_to_reviewer_comments_revision_2.pdf]

## Author's Response To Reviewer Comments

Close

Dear editorial board,

I hereby submit the minor revision with the requested changes.

Your sincerely,

Joachim Wolff

Close
